# Supplementary material for: Improved supercapacitor performance of MnO2–graphene composites constructed using a supercritical fluid and wrapped with an ionic liquid
Source: Royal Society of Chemistry journal article supplement (doi:10.1039/c2ta00986b), 2013-01-01
Supplement: c2ta00986b.pdf [file c2ta00986b.pdf]

**Improved Supercapacitor Performance of MnO<sub>2</sub>-Graphene  
Composites Constructed Using Supercritical Fluid and Wrapped by  
Ionic Liquid**

**Electronic Supplementary Information**

Ming-Tsung Lee<sup>1</sup>, Chen-Yen Fan<sup>1</sup>, Yi-Chen Wang<sup>1</sup>, Hui-Ying Li<sup>1</sup>,  
Jeng-Kuei Chang<sup>1,2,3\*</sup>, Chuan-Ming Tseng<sup>4</sup>

<sup>1</sup> Institute of Materials Science and Engineering,

<sup>2</sup> Department of Chemical and Materials Engineering,

<sup>3</sup> Department of Mechanical Engineering,

National Central University, Taoyuan, Taiwan.

<sup>4</sup> Institute of Physics, Academia Sinica, Taipei, Taiwan

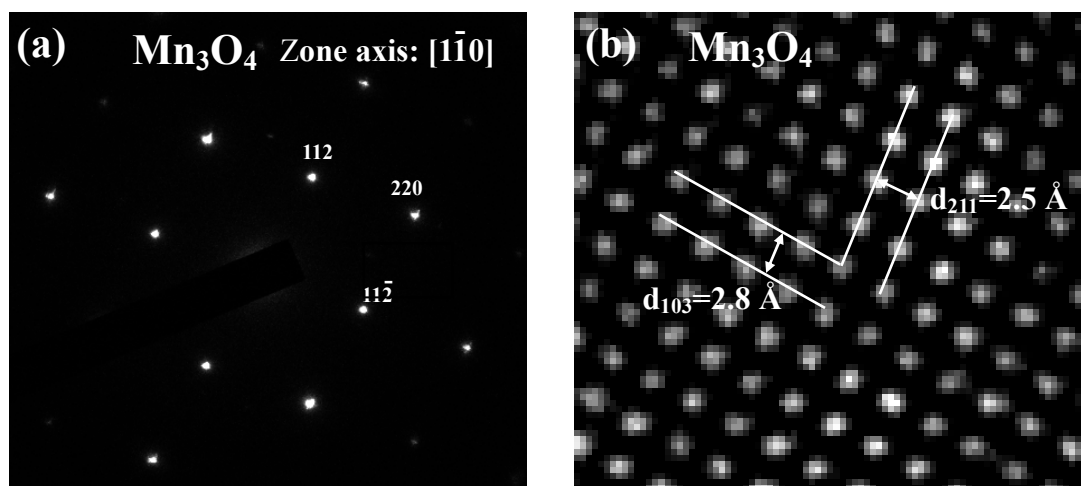

Fig. S11. (a) Electron diffraction pattern and (b) high-resolution lattice image of a  $\text{Mn}_3\text{O}_4$  crystal found in the sample synthesized at a  $\text{CO}_2$  pressure of 6 MPa.

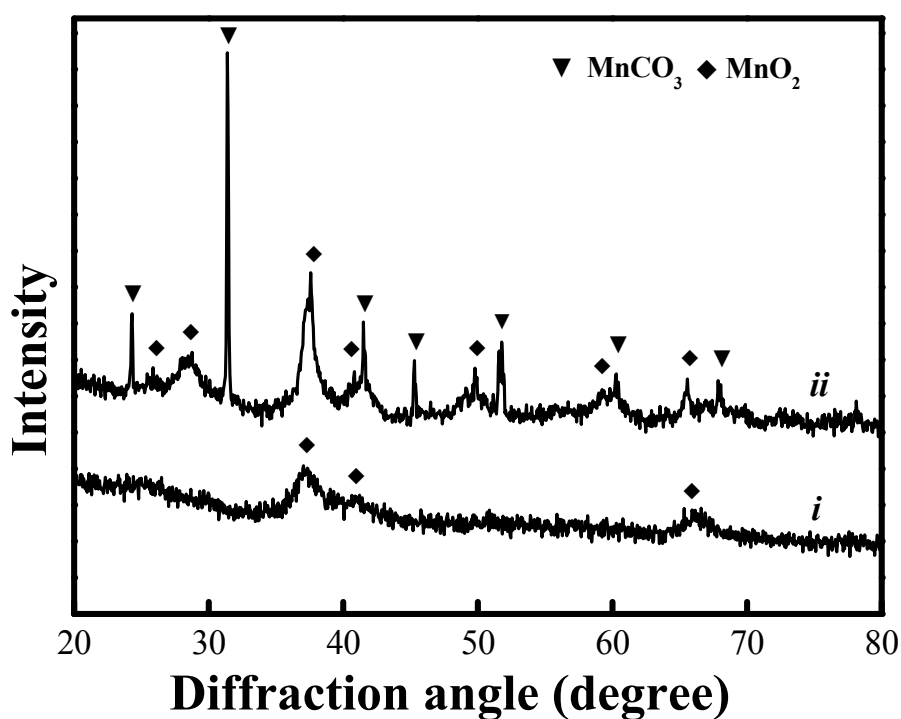

Fig. S12. X-ray diffraction patterns of samples synthesized using 12-MPa  $\text{SCCO}_2$  at 50 °C (curve *i*) and 70 °C (curve *ii*).

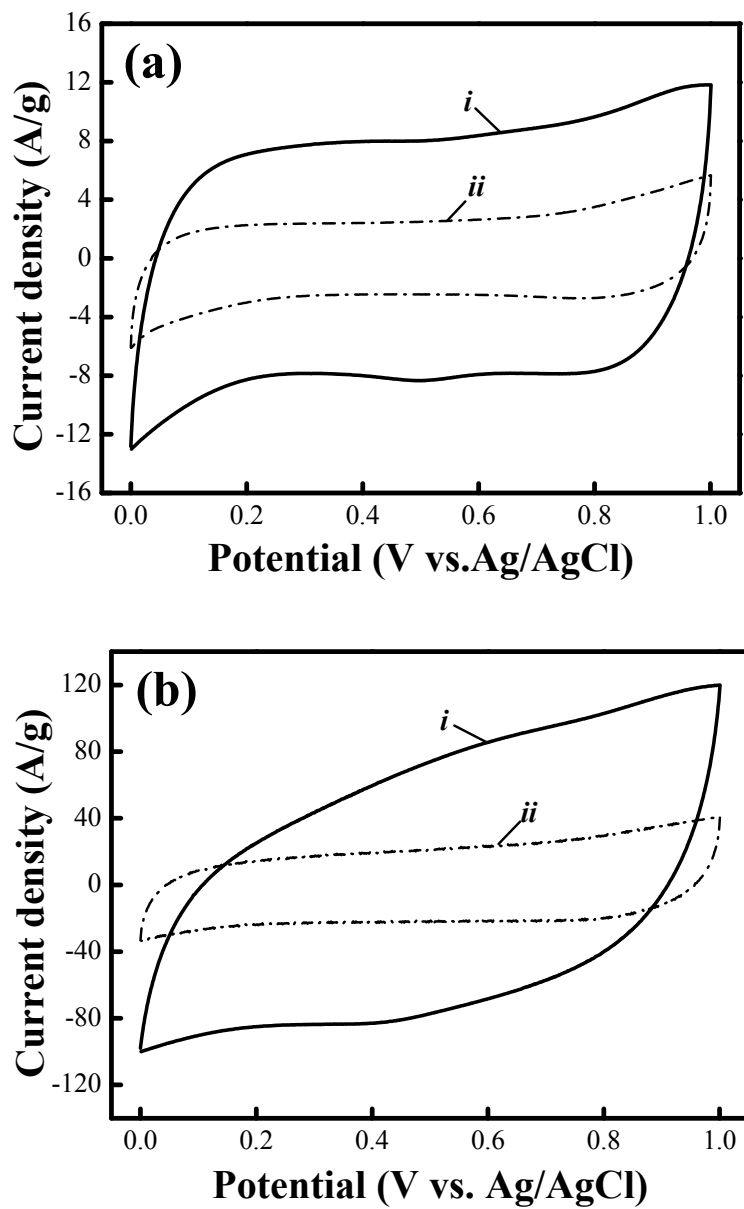

Fig. SI3. Cyclic voltammograms measured at (a) 50 mV/s and (b) 500 mV/s of samples synthesized using 12-MPa SCCO<sub>2</sub> at 50 °C (curves *i*) and 70 °C (curves *ii*).

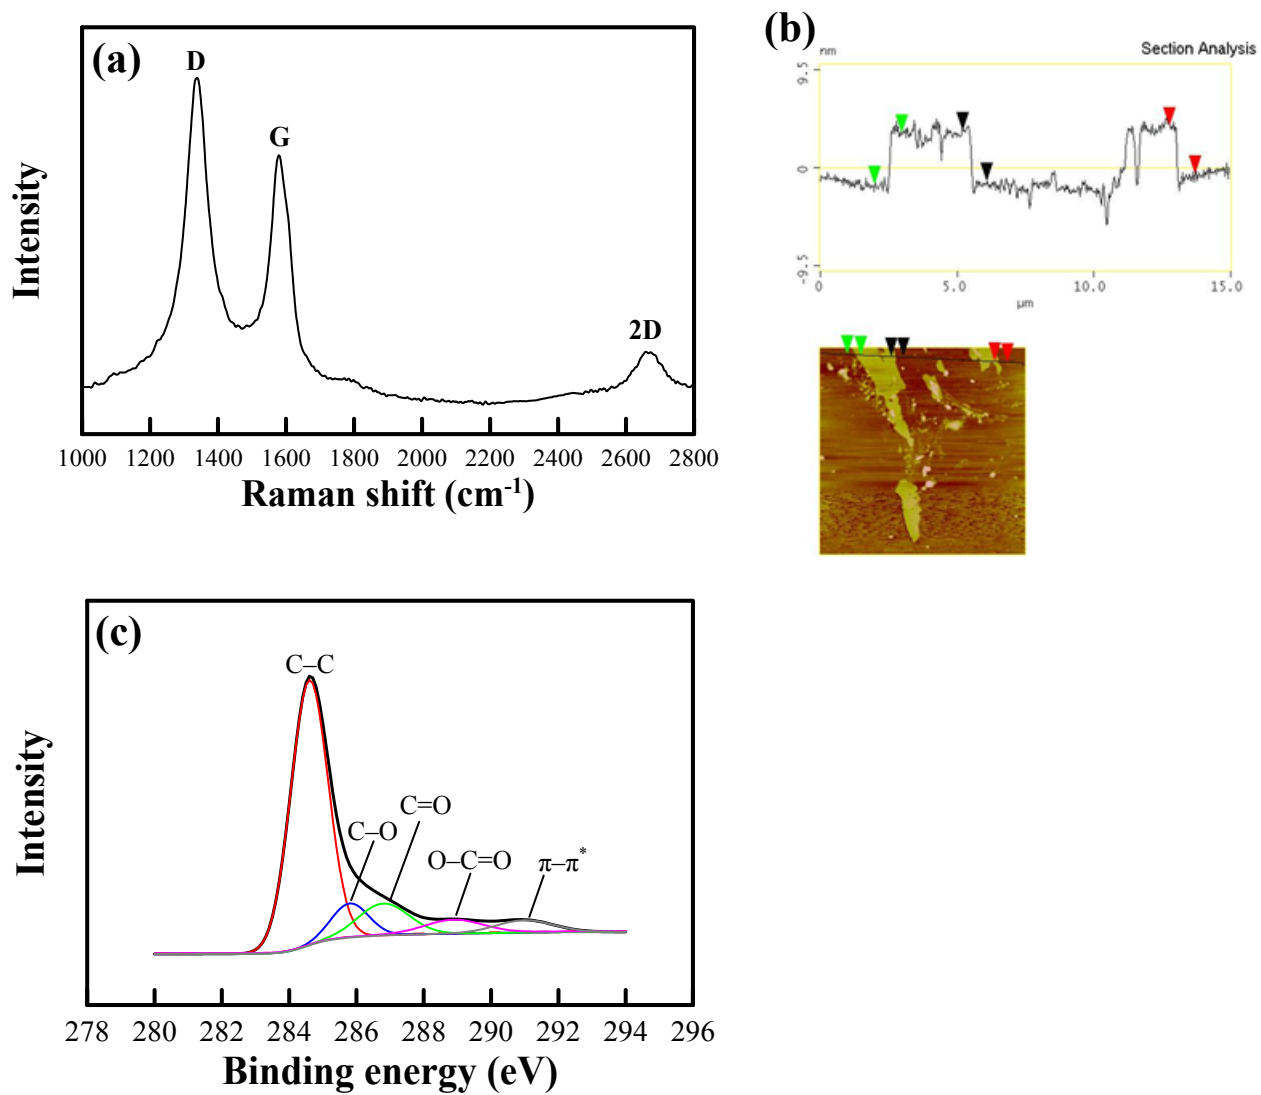

Fig. SI4. (a) Raman spectrum, (b) atomic force microscopy analysis, and (c) X-ray photoelectron spectroscopy spectrum of prepared graphene.

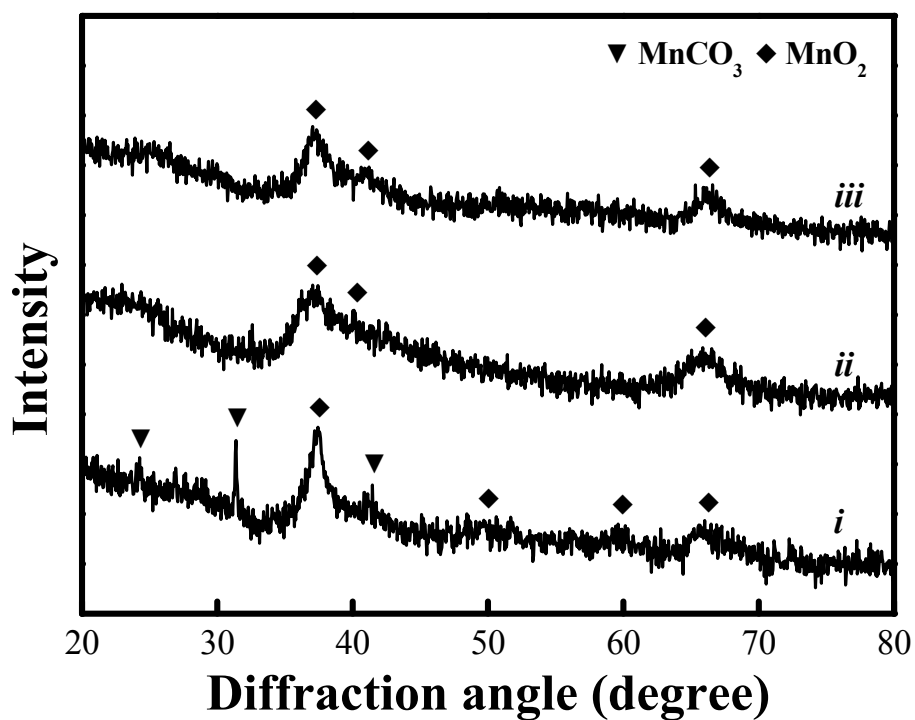

Fig. SI5. X-ray diffraction patterns of  $\text{SCCO}_2$ -derived  $\text{MnO}_2$ /graphene (curve *i*),  
air-derived  $\text{MnO}_2$ /graphene (curve *ii*), and  $\text{SCCO}_2$ -derived  $\text{MnO}_2$  (curve *iii*).  
The synthesis time for the three samples was 3 hours.

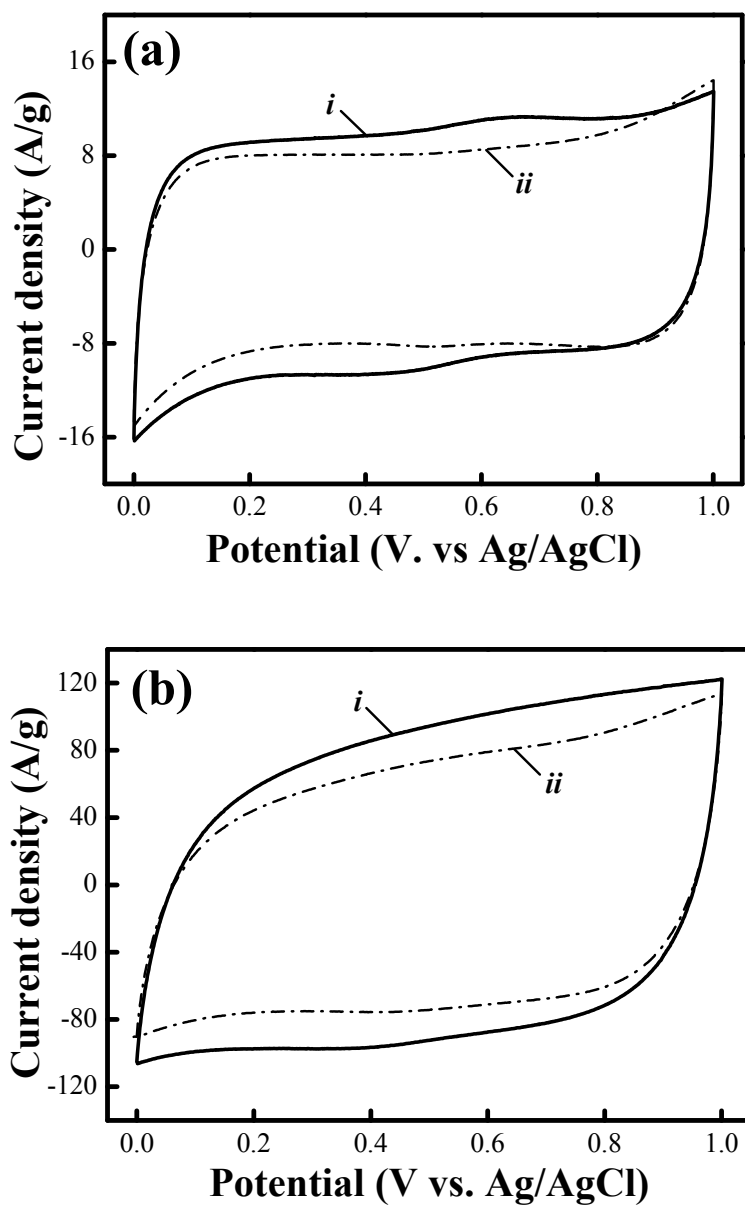

Fig. SI6. Cyclic voltammograms measured at (a) 50 mV/s and (b) 500 mV/s of SCCO<sub>2</sub>-derived MnO<sub>2</sub>/graphene electrodes with synthesis times of 0.5 hours (curves *i*) and 3 hours (curves *ii*).

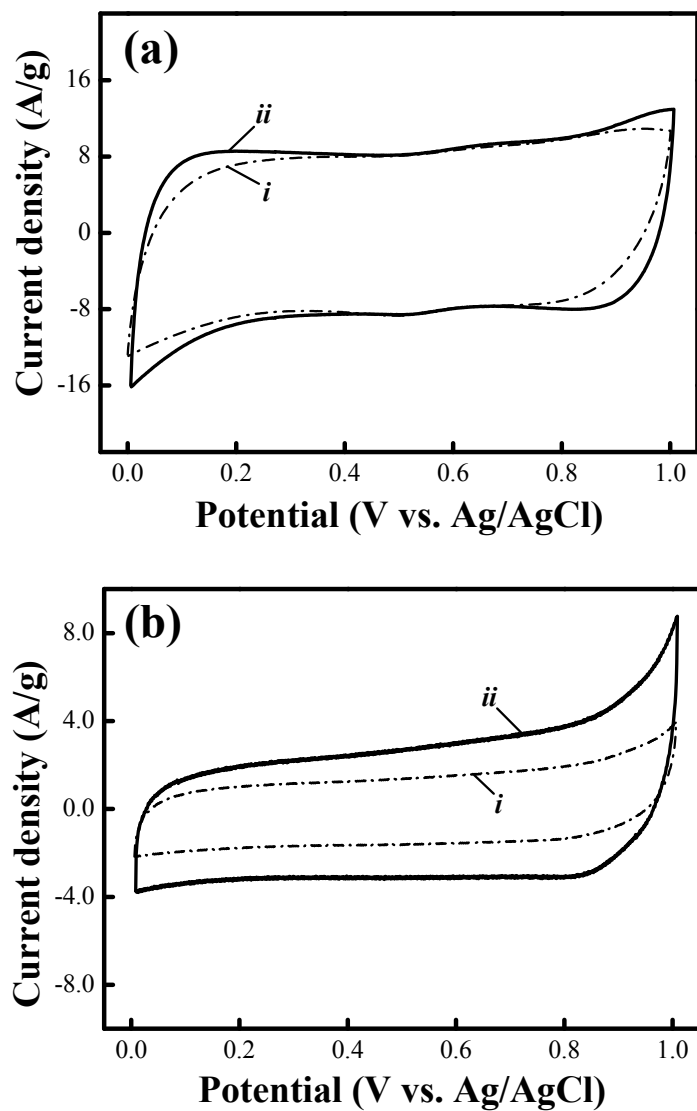

Fig. SI7. Cyclic voltammograms of (a) plain MnO<sub>2</sub> electrodes and (b) plain graphene electrodes without (curves *i*) and with (curves *ii*) IL wrapping measured at a potential scan rate of 50 mV/s.

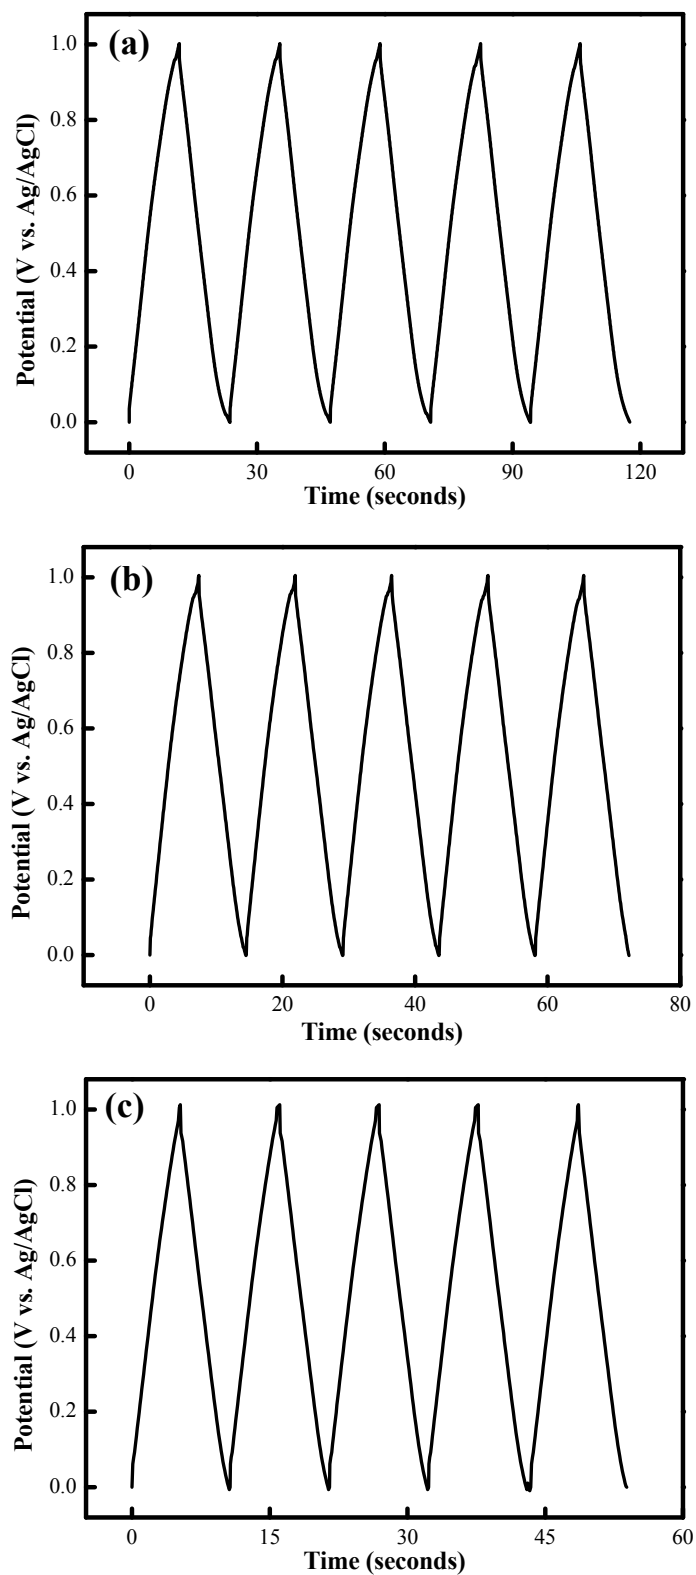

Fig. S18. Galvanic charge–discharge curves of SCCO<sub>2</sub>-MnO<sub>2</sub>/graphene/IL measured with a two-electrode configuration at applied current densities of (a)  $\pm 10$  A/g, (b)  $\pm 15$  A/g, and (c)  $\pm 20$  A/g.
